# Supplementary material for: A Two-Year Randomized Trial of Interventions to Decrease Stress Hormone Vasopressin Production in Patients with Meniere’s Disease—A Pilot Study
Source: PubMed Central journal article supplement (PMC4928871; doi:10.1371/journal.pone.0158309), 2016-06-30
Supplement: pone.0158309.s007.pdf [file pone.0158309.s007.pdf]

|     | sex | age | lat | dur | avp | crt | sds | srs | vf  | hl   |     |
|-----|-----|-----|-----|-----|-----|-----|-----|-----|-----|------|-----|
| 401 | 0   | 29  | 0b  | 6   | 2.9 | 22  | 42  | 18  | 1.3 | 68.8 | G-4 |
| 402 | 1   | 43  | 1   | 14  | 4.8 | 12  | 25  | 30  | 1.3 | 46.7 | G-4 |
| 403 | 1   | 39  | 0b  | 9   | 1.7 | 15  | 24  | 24  | 2   | 28   | G-4 |
| 404 | 0   | 55  | 0   | 10  | 9.3 | 8   | 30  | 11  | 0.5 | 50   | G-4 |
| 405 | 0   | 37  | 0   | 12  | 4.4 | 12  | 32  | 12  | 1.7 | 66   | G-4 |
| 406 | 1   | 63  | 1   | 9   | 1.5 | 15  | 45  | 14  | 0.5 | 31.3 | G-4 |
| 407 | 1   | 39  | 0   | 20  | 3   | 20  | 48  | 15  | 3.3 | 68   | G-4 |
| 408 | 0   | 49  | 1   | 12  | 1.3 | 8   | 38  | 17  | 1   | 55.7 | G-4 |
| 409 | 0   | 71  | 1   | 30  | 2.6 | 14  | 22  | 10  | 2.5 | 48.8 | G-4 |
| 410 | 0   | 47  | 0b  | 35  | 5.9 | 19  | 24  | 22  | 0.5 | 60   | G-4 |
| 411 | 0   | 58  | 1   | 45  | 1.1 | 26  | 33  | 12  | 0.5 | 43.8 | G-4 |
| 412 | 1   | 73  | 0b  | 36  | 1.8 | 30  | 50  | 24  | 0.5 | 73.8 | G-4 |
| 413 | 1   | 59  | 1   | 45  | 2   | 12  | 48  | 16  | 1   | 50   | G-4 |
| 414 | 0   | 45  | 1b  | 70  | 1.4 | 14  | 50  | 37  | 1   | 37.5 | G-4 |
| 415 | 0   | 43  | 0   | 36  | 1.3 | 15  | 46  | 20  | 0.5 | 62.5 | G-4 |
| 416 | 1   | 62  | 1   | 10  | 3.8 | 10  | 24  | 24  | 1.7 | 23.8 | G-4 |
| 417 | 0   | 53  | 1   | 40  | 0.9 | 22  | 28  | 25  | 2   | 61.3 | G-4 |
| 418 | 1   | 64  | 1   | 110 | 1.4 | 25  | 32  | 13  | 2.7 | 68   | G-4 |
| 419 | 0   | 63  | 0   | 36  | 3   | 10  | 34  | 12  | 0.5 | 22.5 | G-4 |
| 420 | 0   | 55  | 0   | 36  | 12  | 12  | 38  | 30  | 1.7 | 77.5 | G-4 |
| 421 | 0   | 39  | 1   | 48  | 5.9 | 25  | 44  | 16  | 1.7 | 37.5 | G-4 |
| 422 | 0   | 56  | 0   | 27  | 16  | 20  | 25  | 17  | 2.5 | 63.8 | G-4 |
| 423 | 0   | 53  | 1   | 33  | 2.9 | 10  | 28  | 18  | 1.7 | 40   | G-4 |
| 424 | 1   | 44  | 1   | 66  | 12  | 5   | 24  | 22  | 3.3 | 66.7 | G-4 |
| 425 | 0   | 42  | 1   | 20  | 0.8 | 6   | 45  | 13  | 1   | 75   | G-4 |
| 426 | 0   | 41  | 0   | 15  | 1.7 | 18  | 22  | 14  | 2.5 | 28.2 | G-4 |
| 427 | 1   | 73  | 0b  | 38  | 2.7 | 22  | 42  | 18  | 3   | 33.6 | G-4 |
| 428 | 1   | 43  | 1b  | 66  | 6.8 | 12  | 25  | 14  | 0.5 | 55   | G-4 |
| 429 | 0   | 43  | 1   | 50  | 2.2 | 28  | 24  | 16  | 0.5 | 63.8 | G-4 |
| 430 | 0   | 33  | 1   | 4   | 0.8 | 15  | 30  | 10  | 3.3 | 38.8 | G-4 |
| 431 | 1   | 34  | 1   | 45  | 2   | 24  | 32  | 26  | 1.7 | 30   | G-4 |
| 432 | 0   | 65  | 0   | 100 | 1.5 | 28  | 45  | 12  | 2.3 | 40.5 | G-4 |
| 433 | 1   | 47  | 0   | 48  | 1.4 | 10  | 48  | 10  | 1.7 | 40.3 | G-4 |
| 434 | 1   | 53  | 1   | 80  | 1.8 | 11  | 38  | 23  | 1   | 40.5 | G-4 |
| 435 | 0   | 63  | 0   | 38  | 4.4 | 16  | 22  | 12  | 2.3 | 28.8 | G-4 |
| 436 | 1   | 47  | 1   | 20  | 2.6 | 18  | 24  | 25  | 2   | 45   | G-4 |
| 437 | 0   | 29  | 1   | 38  | 1   | 14  | 33  | 22  | 0.5 | 56.3 | G-4 |
| 438 | 1   | 23  | 1   | 3   | 1.2 | 10  | 22  | 20  | 1.7 | 32   | G-4 |
| 439 | 0   | 48  | 0   | 42  | 4.2 | 12  | 48  | 12  | 0.5 | 47.5 | G-4 |
| 440 | 0   | 45  | 1b  | 48  | 1.4 | 28  | 50  | 32  | 1.3 | 66.3 | G-4 |
| 441 | 0   | 62  | 0   | 35  | 1.7 | 10  | 26  | 12  | 1   | 61   | G-4 |
| 442 | 0   | 58  | 1   | 60  | 3.2 | 25  | 24  | 11  | 2.5 | 42.5 | G-4 |
| 443 | 0   | 55  | 1   | 3   | 1.5 | 22  | 28  | 20  | 0.5 | 46   | G-4 |
| 444 | 0   | 61  | 0   | 48  | 11  | 16  | 32  | 12  | 0.5 | 73.8 | G-4 |

|     |    |      |    |    |     |     |     |     |     |      |     |
|-----|----|------|----|----|-----|-----|-----|-----|-----|------|-----|
| 445 | 0  | 76   | 1  | 66 | 3   | 8   | 34  | 22  | 0.5 | 36.3 | G-4 |
| 446 | 0  | 34   | 0  | 50 | 1   | 10  | 38  | 22  | 2.5 | 76.3 | G-4 |
| 447 | 0  | 43   | 1b | 25 | 3.4 | 24  | 44  | 21  | 3.5 | 51.3 | G-4 |
| 448 | 0  | 63   | 0  | 49 | 2.3 | 25  | 25  | 30  | 3.3 | 43.5 | G-4 |
| 449 | 1  | 39   | 0  | 4  | 1.9 | 18  | 28  | 23  | 1   | 32   | G-4 |
| 450 | 1  | 58   | 1  | 40 | 1.4 | 10  | 36  | 15  | 1   | 70   | G-4 |
| 451 | 0  | 46   | 1  | 20 | 6.7 | 14  | 28  | 18  | 0.5 | 53.4 | G-4 |
| 452 | 1  | 42   | 0  | 12 | 2.9 | 22  | 36  | 24  | 2   | 62.6 | G-4 |
| 453 | 1  | 45   | 0  | 30 | 3.8 | 16  | 48  | 25  | 1.5 | 38.8 | G-4 |
| 454 | 0  | 64   | 0  | 35 | 0.9 | 25  | 50  | 26  | 2   | 40.3 | G-4 |
| 455 | 0  | 45   | 0  | 4  | 1.4 | 30  | 22  | 12  | 0.5 | 30   | G-4 |
| 456 | 0  | 49   | 0  | 10 | 4.5 | 33  | 23  | 14  | 2.5 | 28.8 | G-4 |
| 457 | 0  | 45   | 1  | 33 | 1   | 25  | 40  | 24  | 3.5 | 36.3 | G-4 |
| 458 | 0  | 55   | 1  | 25 | 5.9 | 22  | 22  | 17  | 3.3 | 46   | G-4 |
| 459 | 1  | 37   | 0b | 12 | 0.8 | 6   | 55  | 16  | 4   | 51.3 | G-4 |
| 460 | 1  | 41   | 1  | 18 | 2.9 | 8   | 30  | 19  | 4   | 55   | G-4 |
| 60  | 22 | 49.7 | 32 | 34 | 3.3 | 17  | 34  | 19  | 1.7 | 49.1 |     |
|     | 38 | 11.9 | 28 | 23 | 3.1 | 7.2 | 9.8 | 6.3 | 1.1 | 15.1 |     |
