# Supplementary material for: A Two-Year Randomized Trial of Interventions to Decrease Stress Hormone Vasopressin Production in Patients with Meniere’s Disease—A Pilot Study
Source: PLoS One. 2016 Jun 30;11(6):e0158309. doi: 10.1371/journal.pone.0158309 (PMC4928871; doi:10.1371/journal.pone.0158309)
Supplement: S2 File — This file is the changed parts of planning from original to final. (PDF) [file pone.0158309.s002.pdf]

**This supplement contains the following items:**

- 1. Protocol: original protocol, final protocol, summary of changes**
- 2. Statistics: original statistical analysis plan, final statistical analysis plan, summary of changes**

# 1. Protocol:

## Original protocol

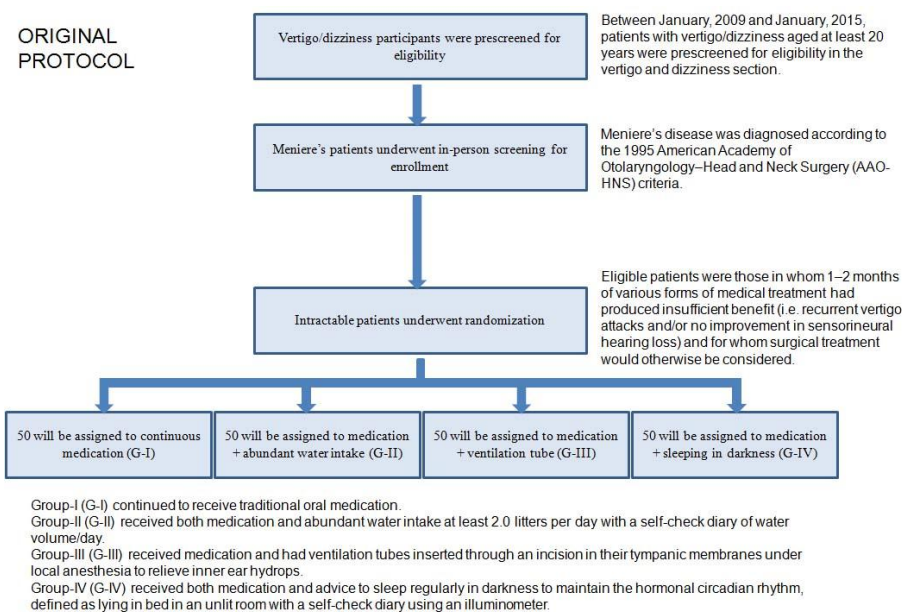

## Final protocol

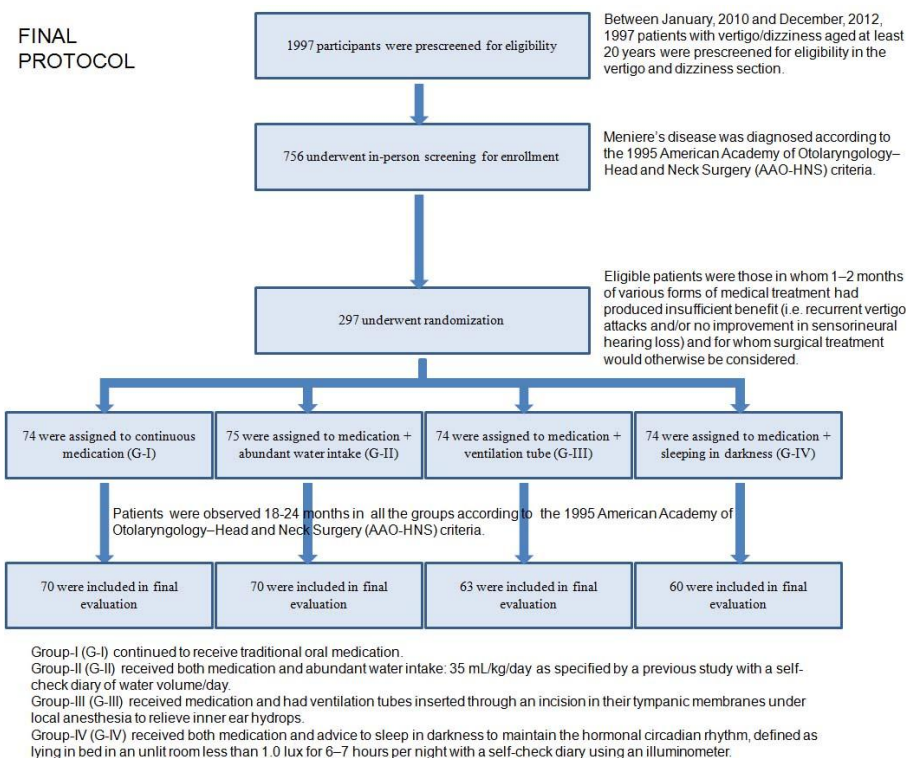

## **Summary of changes**

- 1) A principal investigator, Tadashi Kitahara, moved from an Associate Professor of Osaka University to a Professor & chairman of Nara Medical University.  
REASONS: Just a promotion matter in May 1<sup>st</sup>, 2014.
- 2) Periods of patients' enrollment changed from January, 2015 to December, 2012 and those of clinical observation changed from January, 2020 to December, 2014.  
REASONS: We could enroll cases more promptly than we expected.
- 3) Numbers of patients changed from 200 (50 in each group) to 263 (G-I 70, G-II 70, G-III 63, G-IV 60).  
REASONS: We could enroll more cases than we expected.
- 4) More detailed description of the condition of Medication + Water intake Group (G-II) was made as 35 mL/kg/day in the final protocol.  
REASONS: We clinically did it from the beginning of this study but did not describe in the start protocol.
- 5) More detailed description of the condition of Medication + Regular sleep Group (G-IV) was made as unlit room less than 1.0 lux for 6-7 hours in the final protocol.  
REASONS: We clinically did it from the beginning of this study but did not describe in the start protocol.
- 6) Nothing else was changed between the original and final.

## **2. Statistics:**

### **Original statistical analysis plan**

As seen in our manuscript, all treatment results were expressed as ratios of the number

of cases and assessed statistically by SPSS version 16.0 (Chicago, IL). For post-treatment results, the  $\chi^2$  test (for vertigo) and Mann-Whitney U-test (for hearing) were used to compare various pairs of the four groups, G-I, G-II, G-III, and G-IV. Student's paired *t*-test and repeated measures ANOVA were used to examine the statistical significance of changes in laboratory data and questionnaire points after each treatment. All reported p-values were two-sided and those under 0.05 were considered significant.

### **Final statistical analysis plan**

Numbers of patients changed from 200 (50 in each group) to 263 (G-I 70, G-II 70, G-III 63, G-IV 60). The statistical analysis was performed in the same way as above.

### **Summary of changes**

Nothing in the way of statistical analysis was changed between the original and final.
